# Supplementary material
Source: ML conference proceedings conference paper supplement (https://proceedings.neurips.cc/paper_files/paper/2019/hash/50a074e6a8da4662ae0a29edde722179-Abstract.html)
Supplement: Supplementary file [file 50a074e6a8da4662ae0a29edde722179-Supplemental.zip]

---

# Supplementary Material for "Dynamic Local Regret for Non-convex Online Forecasting"

---

## A.1 Proof of Lemma 3.1

*Proof.* Due to the  $\beta$ -smoothness of  $f_t$  functions,  $S_t$  is  $\beta$ -smooth as well. Hence, we have:

$$\begin{aligned}
 S_{t,w,\alpha}(x_{t+1}) - S_{t,w,\alpha}(x_t) &\leq \langle \nabla S_{t,w,\alpha}(x_t), x_{t+1} - x_t \rangle + \frac{\beta}{2} \|x_{t+1} - x_t\|^2 \\
 &= -\eta \langle \nabla S_{t,w,\alpha}(x_t), \tilde{\nabla} S_{t,w,\alpha}(x_t) \rangle + \eta^2 \frac{\beta}{2} \|\tilde{\nabla} S_{t,w,\alpha}(x_t)\|^2 - \eta \|\nabla S_{t,w,\alpha}(x_t)\|^2 \\
 &\quad - \eta \langle \nabla S_{t,w,\alpha}(x_t), \tilde{\nabla} S_{t,w,\alpha}(x_t) - \nabla S_{t,w,\alpha}(x_t) \rangle + \eta^2 \frac{\beta}{2} (\|\nabla S_{t,w,\alpha}(x_t)\|^2) \\
 &\quad + \eta^2 \frac{\beta}{2} \left( 2 \langle \nabla S_{t,w,\alpha}(x_t), \tilde{\nabla} S_{t,w,\alpha}(x_t) - \nabla S_{t,w,\alpha}(x_t) \rangle \right) \\
 &\quad + \eta^2 \frac{\beta}{2} (\|\tilde{\nabla} S_{t,w,\alpha}(x_t) - \nabla S_{t,w,\alpha}(x_t)\|^2) \tag{1}
 \end{aligned}$$

$$\begin{aligned}
 &= - \left( \eta - \frac{\beta}{2} \eta^2 \right) \|\nabla S_{t,w,\alpha}(x_t)\|^2 \\
 &\quad - (\eta - \beta \eta^2) \langle \nabla S_{t,w,\alpha}(x_t), \tilde{\nabla} S_{t,w,\alpha}(x_t) - \nabla S_{t,w,\alpha}(x_t) \rangle \\
 &\quad + \eta^2 \frac{\beta}{2} \|\tilde{\nabla} S_{t,w,\alpha}(x_t) - \nabla S_{t,w,\alpha}(x_t)\|^2. \tag{2}
 \end{aligned}$$

Now, by applying  $\mathbb{E}[\cdot \mid x_t]$  on both sides of the above equation and using the result in equation 4, we prove the lemma:

$$\begin{aligned}
 \left( \eta - \frac{\beta}{2} \eta^2 \right) \|\nabla S_{t,w,\alpha}(x_t)\|^2 &\leq \mathbb{E} [S_{t,w,\alpha}(x_t) - S_{t,w,\alpha}(x_{t+1})] + \eta^2 \frac{\beta}{2} \frac{\sigma^2(1 - \alpha^{2w})}{W^2(1 - \alpha^2)} \\
 &= S_{t,w,\alpha}(x_t) - S_{t+1,w,\alpha}(x_{t+1}) + S_{t+1,w,\alpha}(x_{t+1}) - S_{t,w,\alpha}(x_{t+1}) \\
 &\quad + \eta^2 \frac{\beta}{2} \frac{\sigma^2(1 - \alpha^{2w})}{W^2(1 - \alpha^2)}. \tag{3}
 \end{aligned}$$

□

## A.2 Proof of Lemma 3.2

*Proof.*

$$\begin{aligned}
S_{t+1,w,\alpha}(x_{t+1}) - S_{t,w,\alpha}(x_{t+1}) &= \frac{1}{W} \sum_{i=0}^{w-1} \alpha^i (f_{t+1-i}(x_{t+1-i}) - f_{t-i}(x_{t+1-i})) \\
&= \frac{1}{W} \{f_{t+1}(x_{t+1}) - f_t(x_{t+1}) + \alpha f_t(x_t) - \alpha f_{t-1}(x_t) + \dots \\
&\quad + \alpha^{w-1} f_{t-w+2}(x_{t-w+2}) - \alpha^{w-1} f_{t-w+1}(x_{t-w+2})\} \\
&= \frac{1}{W} f_{t+1}(x_{t+1}) - \frac{\alpha^{w-1}}{W} f_{t-w+1}(x_{t-w+2}) \\
&\quad + \frac{1}{W} \sum_{i=1}^{w-1} \alpha^i f_{t-i+1}(x_{t-i+1}) - \alpha^{i-1} f_{t-i+1}(x_{t-i+2}) \quad (4) \\
&\leq \frac{M(1+\alpha^{w-1})}{W} + \frac{M(1-\alpha^{w-1})(1+\alpha)}{W(1-\alpha)} \quad (5)
\end{aligned}$$

where the following inequality follows from  $\frac{1}{W} f_{t+1}(x_{t+1}) - \frac{\alpha^{w-1}}{W} f_{t-w+1}(x_{t-w+2}) \leq \frac{M(1+\alpha^{w-1})}{W}$  and  $\frac{1}{W} \sum_{i=1}^{w-1} \alpha^i f_{t-i+1}(x_{t-i+1}) - \alpha^{i-1} f_{t-i+1}(x_{t-i+2}) \leq + \frac{M(1-\alpha^{w-1})(1+\alpha)}{W(1-\alpha)}$ .  $\square$

## A.3 Proof of Lemma 3.3

*Proof.* The proof simply follows from the boundedness property of  $f_t$ :

$$\begin{aligned}
S_{t,w,\alpha}(x_t) - S_{t+1,w,\alpha}(x_{t+1}) &= \frac{1}{W} \sum_{i=0}^{w-1} \alpha^i (f_{t-i}(x_{t-i}) - f_{t+1-i}(x_{t+1-i})) \\
&\leq \frac{2M(1-\alpha^w)}{W(1-\alpha)}. \quad (6)
\end{aligned}$$

$\square$

## A.4 Proof of Theorem 3.4

*Proof.* Using the results from lemmas 3.1, 3.2 and 3.3, we can write the following inequality for  $\|\nabla S_{t,w,\alpha}(x_t)\|^2$  as:

$$\|\nabla S_{t,w,\alpha}(x_t)\|^2 \leq \frac{\frac{2M(1-\alpha^w)}{W(1-\alpha)} + \frac{M(1+\alpha^{w-1})}{W} + \frac{M(1-\alpha^{w-1})(1+\alpha)}{W(1-\alpha)} + \eta^2 \frac{\beta}{2} \frac{\sigma^2(1-\alpha^{2w})}{W^2(1-\alpha^2)}}{\eta - \frac{\eta^2 \beta}{2}} \quad (7)$$

Substituting  $\eta = 1/\beta$  yields:

$$\begin{aligned}
\|\nabla S_{t,w,\alpha}(x_t)\|^2 &\leq \frac{2\beta M}{W} \left( \frac{2(1-\alpha^w)}{1-\alpha} + (1+\alpha^{w-1}) + \frac{(1-\alpha^{w-1})(1+\alpha)}{(1-\alpha)} \right) + \frac{\sigma^2(1-\alpha^{2w})}{W^2(1-\alpha^2)} \\
&\leq \frac{2\beta M}{W} \left( \frac{2(1-\alpha^w)}{1-\alpha} + (1+\alpha^{w-1}) + \frac{(1-\alpha^w)(1+\alpha)}{(1-\alpha)} \right) + \frac{\sigma^2(1-\alpha^{2w})}{W^2(1-\alpha^2)} \\
&= \frac{2\beta M}{W} \left( \frac{1-\alpha^w}{1-\alpha} (3+\alpha) + (1+\alpha^{w-1}) \right) + \frac{\sigma^2(1-\alpha^{2w})}{W^2(1-\alpha^2)} \\
&\leq \frac{2\beta M}{W} \left( 4\frac{1-\alpha^w}{1-\alpha} + (1+\alpha^{w-1}) \right) + \frac{\sigma^2(1-\alpha^{2w})}{W^2(1-\alpha^2)} \\
&\leq \frac{2\beta M}{W} \left( 4\frac{1-\alpha^w}{1-\alpha} + \frac{(1+\alpha^{w-1})}{1-\alpha} \right) + \frac{\sigma^2(1-\alpha^{2w})}{W^2(1-\alpha^2)} \\
&\leq \frac{8\beta M}{W} \left( \frac{1-\alpha^w}{1-\alpha} + \frac{(1+\alpha^{w-1})}{1-\alpha} \right) + \frac{\sigma^2(1-\alpha^{2w})}{W^2(1-\alpha^2)} \\
&= \frac{8\beta M}{W} \left( \frac{2-\alpha^w+\alpha^{w-1}}{1-\alpha} \right) + \frac{\sigma^2(1-\alpha^{2w})}{W^2(1-\alpha^2)} \tag{8}
\end{aligned}$$

As  $\alpha \rightarrow 1^-$ , we get the following inequality:

$$\lim_{\alpha \rightarrow 1^-} \|\nabla S_{t,w,\alpha}(x_t)\|^2 \leq \frac{1}{W} (8\beta M + \sigma^2) \tag{9}$$

Summing the above inequality over  $T$  concludes the proof.  $\square$

## A.5 Computational Details

We use Python 3.7 for implementation [Oliphant, 2007] using open source library PyTorch [Paszke et al., 2017]. We use 2 NVIDIA GeForce RTX 2080 Ti GPUs with 512 GB Memory to run our experiments.

## A.6 Comparison with Online SGD with Momentum

We compare our approach with SGD online with momentum. Figure A.1 shows that SGD online with momentum is not as robust as our DTS-SGD to large values of learning rate.

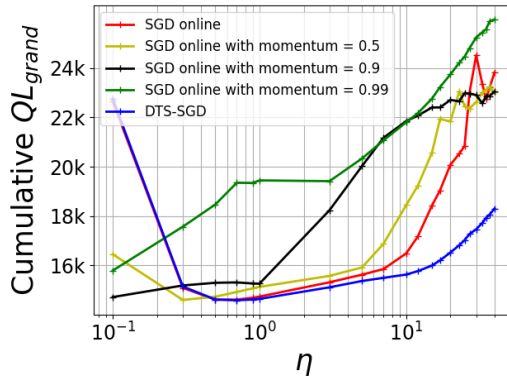

Figure A.1: SGD online with momentum

## References

Travis E Oliphant. Python for scientific computing. *Computing in Science & Engineering*, 9(3): 10–20, 2007.

Adam Paszke, Sam Gross, Soumith Chintala, and Gregory Chanan. Pytorch, 2017.
